# Supplementary material
Source: MDPI journal article supplement (https://www.mdpi.com/1424-2818/15/10/1071)
Supplement: s1 [file s1]

**Table S1: List of environment variables used in MaxEnt modelling.**

| Environment Variables                                                    | Units       | Data sources                                                          |
|--------------------------------------------------------------------------|-------------|-----------------------------------------------------------------------|
| <i>Land-use</i> <sup>1</sup>                                             | -           | Resource and Environment Science and Data Center (www.resdc.cn)       |
| <i>Distance to water system</i>                                          | m           | National Catalogue Service for Geographic Information (www.webmap.cn) |
| Topographical variables                                                  |             |                                                                       |
| <i>Elevation</i>                                                         | m           | Geospatial Data Cloud (www.gscloud.cn)                                |
| <i>Slope</i>                                                             | °           |                                                                       |
| <i>Aspect</i>                                                            | Mean aspect |                                                                       |
| Bioclimatic variables                                                    |             |                                                                       |
| BIO1 (Annual Mean Temperature)                                           | °C*10       | WorldClim (www.worldclim.org)                                         |
| <i>BIO2 (Mean Diurnal Range) (Mean of monthly (max temp - min temp))</i> | °C*10       |                                                                       |
| BIO3 (Isothermality)                                                     | 1           |                                                                       |
| BIO4 (Temperature Seasonality)                                           | 1           |                                                                       |
| BIO5 (Max Temperature of Warmest Month)                                  | °C*10       |                                                                       |
| BIO6 (Min Temperature of Coldest Month)                                  | °C*10       |                                                                       |
| BIO7 (Temperature Annual Range)                                          | °C*10       |                                                                       |
| BIO8 (Mean Temperature of Wettest Quarter)                               | °C*10       |                                                                       |
| BIO9 (Mean Temperature of Driest Quarter)                                | °C*10       |                                                                       |
| BIO10 (Mean Temperature of Warmest Quarter)                              | °C*10       |                                                                       |
| BIO11 (Mean Temperature of Coldest Quarter)                              | °C*10       |                                                                       |
| BIO12 (Annual Precipitation)                                             | mm          |                                                                       |
| BIO13 (Precipitation of Wettest Month)                                   | mm          |                                                                       |
| BIO14 (Precipitation of Driest Month)                                    | mm          |                                                                       |
| <i>BIO15 (Precipitation Seasonality)</i>                                 | 1           |                                                                       |
| BIO16 (Precipitation of Wettest Quarter)                                 | mm          |                                                                       |
| BIO17 (Precipitation of Driest Quarter)                                  | mm          |                                                                       |
| BIO18 (Precipitation of Warmest Quarter)                                 | mm          |                                                                       |
| BIO19 (Precipitation of Coldest Quarter)                                 | mm          |                                                                       |

<sup>1</sup> Final choice environment variables in italics.
